# Supplementary material for: A New Immunological Index for the Elderly: High Proportion of Multiple TCR T Cells Based on scRNA-Seq
Source: PubMed Central journal article supplement (PMC11081166; doi:10.14336/ad.2023.0509-1), 2024-05-07
Supplement: AD-15-3-948-s.pdf [file AD-15-3-948-s.pdf]

## SUPPLEMENTARY DATA

# **A New Immunological Index for the Elderly: High Proportion of Multiple TCR T Cells Based on scRNA-Seq**

**Li Jun, Zhu Lanwei, Wang Jiayi, Yao Xinsheng**

# SUPPLEMENTARY DATA

**Supplemental Table 1.** The basic information of T cells with single or multiple TCRs.

| Samples       | Accession number | Total T cells | T cells (%) |           |           |            |
|---------------|------------------|---------------|-------------|-----------|-----------|------------|
|               |                  |               | One TCR     | Multi-TCR | TRB+ nTRA | nTRB+ mTRA |
| Cord blood    | GSM4750320       | 1837          | 88.459      | 11.541    | 5.988     | 5.553      |
|               | GSM4750321       | 2741          | 86.976      | 13.024    | 7.187     | 5.837      |
|               | GSM4750322       | 3067          | 85.523      | 14.477    | 6.293     | 8.184      |
| Young blood   | GSM4750317       | 2437          | 90.562      | 9.438     | 5.252     | 4.185      |
|               | GSM4750318       | 2262          | 89.920      | 10.080    | 4.775     | 5.305      |
|               | GSM4750319       | 2941          | 89.629      | 10.371    | 5.202     | 5.168      |
| Elderly blood | GSM4750323       | 2074          | 88.042      | 11.958    | 9.402     | 2.555      |
|               | GSM4750325       | 3431          | 87.205      | 12.795    | 7.112     | 5.683      |
|               | GSM5684309       | 3437          | 85.569      | 14.431    | 10.911    | 3.521      |
|               | GSM5684310       | 4122          | 84.619      | 15.381    | 4.051     | 11.329     |
|               | GSM5684311       | 4182          | 86.227      | 13.773    | 11.526    | 2.248      |

$n \geq 2$ ,  $m \geq 1$ . We appreciate the single-cell V(D)J sequencing data shared by Luo et al. and Park et al.
